# Supplementary material for: Depressive Symptoms in Youth With Type 1 or Type 2 Diabetes: Results of the Pediatric Diabetes Consortium Screening Assessment of Depression in Diabetes Study
Source: Oxford University Press journal article supplement (doi:10.2337/dc15-0982), 2015-10-12
Supplement: dc150982supplementarydata.pdf [file dc150982supplementarydata.pdf]

SUPPLEMENTARY DATA

**Supplementary Table 1. Demographics and Clinical Characteristics of Participants**

|                                                              | T1D            |     | T2D              |     |
|--------------------------------------------------------------|----------------|-----|------------------|-----|
|                                                              | N              | %   | N                | %   |
| Overall N                                                    | 261*           | 100 | 339 <sup>a</sup> | 100 |
| Diabetes Duration                                            |                |     |                  |     |
| <1 year                                                      | 2              | <1% | 112              | 33% |
| 1–<2 years                                                   | 6              | 2%  | 74               | 22% |
| 2–<3 years                                                   | 101            | 39% | 59               | 17% |
| 3–<4 years                                                   | 122            | 47% | 38               | 11% |
| ≥4 years                                                     | 30             | 11% | 56               | 17% |
| <i>Median (25<sup>th</sup>, 75<sup>th</sup> percentiles)</i> | 3.2 (2.8, 3.7) |     | 1.7 (0.6, 3.3)   |     |
| <i>Range</i>                                                 | 0.0 – 4.7      |     | 0.0 – 8.8        |     |
| Age                                                          |                |     |                  |     |
| 10–<13 years                                                 | 91             | 35% | 61               | 18% |
| 13–<15 years                                                 | 87             | 33% | 86               | 25% |
| 15–<18 years                                                 | 83             | 32% | 192              | 57% |
| <i>Mean ± SD</i>                                             | 13.9 ± 2.1     |     | 15.1 ± 2.0       |     |
| <i>Range</i>                                                 | 10.0 – 17.9    |     | 10.0 – <18.0     |     |
| Gender                                                       |                |     |                  |     |
| Female                                                       | 128            | 49% | 219              | 65% |
| Male                                                         | 133            | 51% | 120              | 35% |
| Race/Ethnicity                                               |                |     |                  |     |
| White                                                        | 155            | 60% | 26               | 8%  |
| Hispanic or Latino                                           | 64             | 25% | 194              | 58% |
| Black/African American                                       | 22             | 9%  | 94               | 28% |
| Other/Multiple race                                          | 17             | 7%  | 22               | 7%  |
| Lives with Single Parent                                     | 74             | 28% | 164              | 49% |
| Health Insurance                                             |                |     |                  |     |
| Private                                                      | 151            | 59% | 89               | 26% |
| Children’s Health Plan or Other Government                   | 87             | 34% | 225              | 66% |
| Military                                                     | 6              | 2%  | 3                | <1% |
| None                                                         | 12             | 5%  | 22               | 6%  |
| Parent Education                                             |                |     |                  |     |
| High School or less                                          | 89             | 41% | 228              | 72% |
| Associate                                                    | 31             | 14% | 44               | 14% |
| Bachelor                                                     | 59             | 27% | 34               | 11% |
| Master/Professional Degree                                   | 37             | 17% | 12               | 4%  |
| Family Income                                                |                |     |                  |     |
| <\$25,000                                                    | 34             | 18% | 106              | 46% |
| \$25,000–\$49,999                                            | 39             | 21% | 73               | 32% |
| \$50,000–\$74,999                                            | 33             | 18% | 27               | 12% |
| \$75,000–\$99,999                                            | 25             | 13% | 13               | 6%  |
| ≥\$100,000                                                   | 56             | 30% | 10               | 4%  |
| BMI Percentile                                               |                |     |                  |     |
| <85                                                          | 81             | 62% | 10               | 3%  |
| 85–<95                                                       | 24             | 18% | 32               | 10% |
| 95–<99                                                       | 18             | 14% | 138              | 43% |
| ≥99                                                          | 8              | 6%  | 142              | 44% |
| HbA1c % (mmol/mol)                                           |                |     |                  |     |
| <6 (<42)                                                     | 6              | 3%  | 75               | 24% |
| 6–<7 (42–<53)                                                | 28             | 15% | 65               | 21% |

SUPPLEMENTARY DATA

|                  |            |     |            |     |
|------------------|------------|-----|------------|-----|
| 7–<8 (53–<64)    | 58         | 30% | 47         | 15% |
| 8–<9 (64–<75)    | 43         | 22% | 32         | 10% |
| ≥9 (≥75)         | 57         | 30% | 89         | 29% |
| <i>Mean ± SD</i> | 8.3 ± 1.7  |     | 7.9 ± 2.4  |     |
|                  | (67 ± 18)  |     | (63 ± 26)  |     |
| <i>Range</i>     | 5.5 – 15.0 |     | 4.8 – 15.5 |     |
|                  | (37 – 140) |     | (29 – 146) |     |
| <u>Pump Use</u>  | 111        | 43% | 0          | 0%  |

\* Number of participants with missing or unknown data by type (Type 1/Type 2):race/ethnicity (3/3), lives with (0/3), health insurance (5/0), parent education (45/21), family income (74/110), BMI % (130/17) and HbA1c % (69/31).
